# Supplementary material for: Combining Polymer and Cyclodextrin Strategy for Drug Release of Sulfadiazine from Electrospun Fibers
Source: MDPI journal article supplement (doi:10.3390/pharmaceutics15071890), 2023-07-05
Supplement: s1 [file s1]

## Supplementary Material

# Combining Polymer and Cyclodextrin Strategy for Drug Release of Sulfadiazine from Electrospun Fibers

Diego C. Morais <sup>1</sup>, Marina L. Fontes <sup>2</sup>, Analú B. Oliveira <sup>3</sup>, Paulo R. Gabbai-Armelin <sup>3</sup>, Túlio M. Ferrisse <sup>4</sup>, Luiz F. C. De Oliveira <sup>5</sup>, Fernanda Lourenção Brighenti <sup>3</sup>, Hernane S. Barud <sup>2</sup> and Frederico B. De Sousa <sup>1,\*</sup>

<sup>1</sup> Laboratório de Sistemas Poliméricos e Supramoleculares (LSPS), Instituto de Física e Química, Universidade Federal de Itajubá (UNIFEI), Itajubá 37500-903, MG, Brazil; diegocapronimorais@gmail.com

<sup>2</sup> Laboratório de Biopolímeros e Biomateriais, Universidade de Araraquara (UNIARA), Araraquara 14801-340, SP, Brazil; marinafontes29@gmail.com (M.L.F.); hernane.barud@gmail.com (H.S.B.)

<sup>3</sup> Department of Morphology and Pediatric Dentistry, School of Dentistry, São Paulo State University (UNESP), Araraquara 14801-903, SP, Brazil; analu.oliveira@unesp.br (A.B.O.); paulogabbai@gmail.com (P.R.G.-A.); f.brighenti@unesp.br (F.L.B.)

<sup>4</sup> Department of Dental Materials and Prosthodontics, School of Dentistry, São Paulo State University (Unesp), Araraquara 14801-903, SP, Brazil; tuliomferrisse@gmail.com

<sup>5</sup> Núcleo de Espectroscopia E Estrutura Molecular—Departamento de Química—ICE, Universidade Federal de Juiz de Fora (UFJF), Juiz de Fora 36036-900, MG, Brazil; luiz.oliveira@ufjf.br

\* Correspondence: fredbsousa@unifei.edu.br

## S1: Histograms

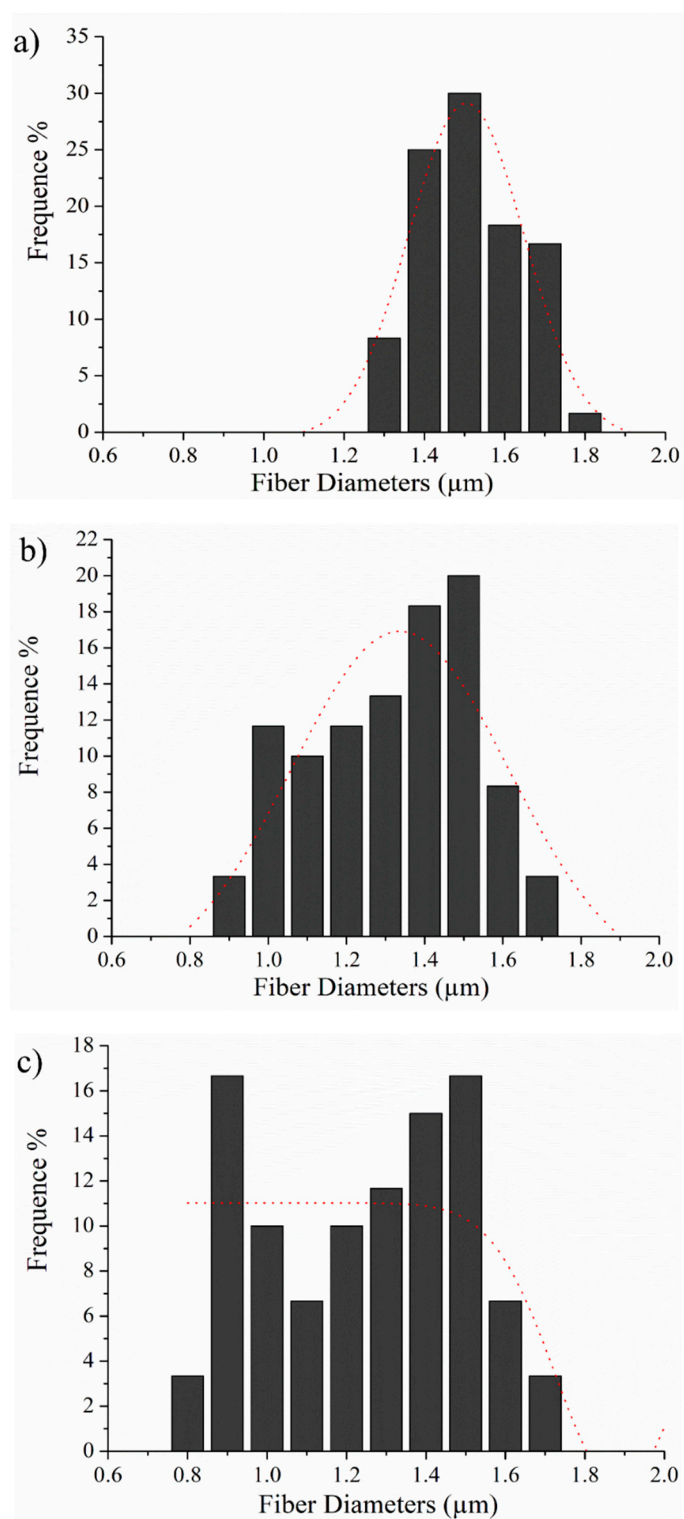

**Figure S1:** Histograms of fiber diameter distribution for: (a) PMMA, (b) PMMA SDS, and (c) PMMA SDS/HP $\beta$ CD.

## S2: Histograms

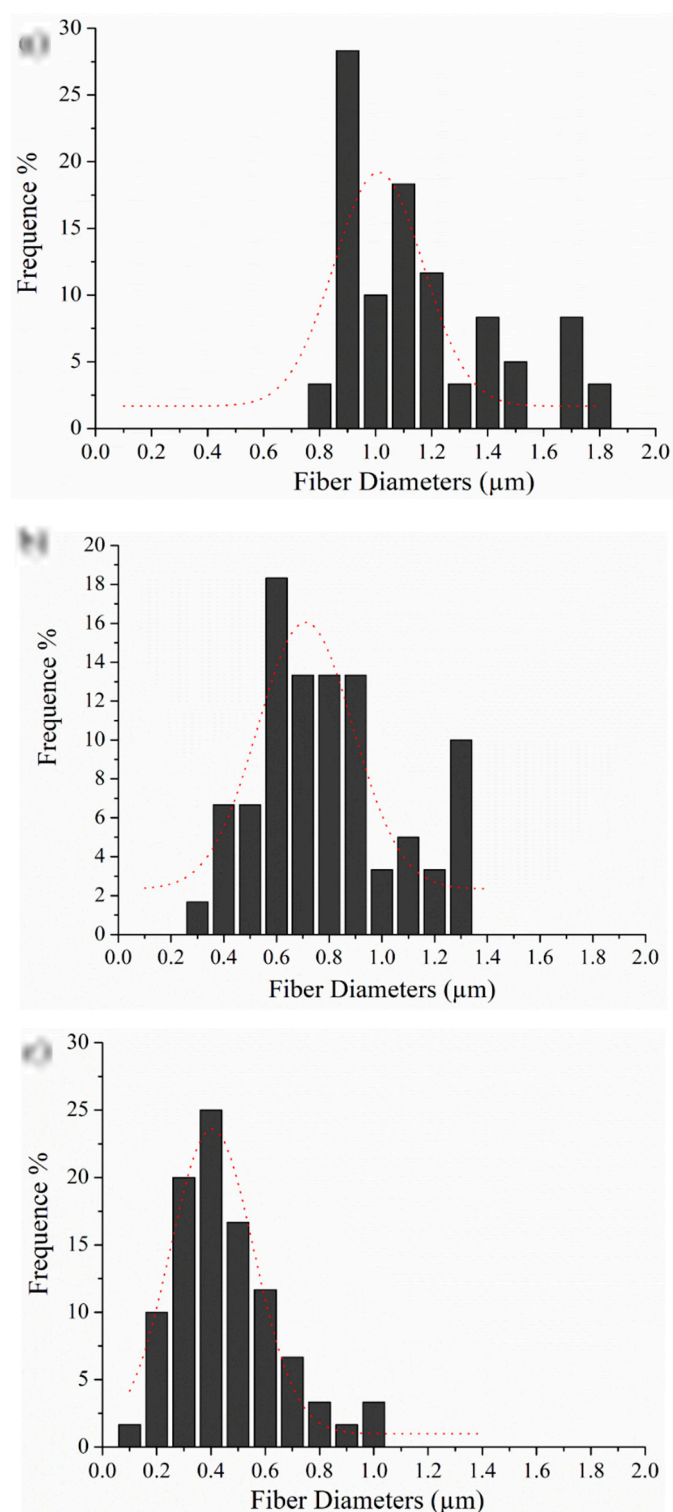

**Figure S2:** Histograms of fiber diameter distribution for: (a) PLGA, (b) PLGA SDS, and (c) PLGA SDS/HP $\beta$ CD.

S3: Contact angle

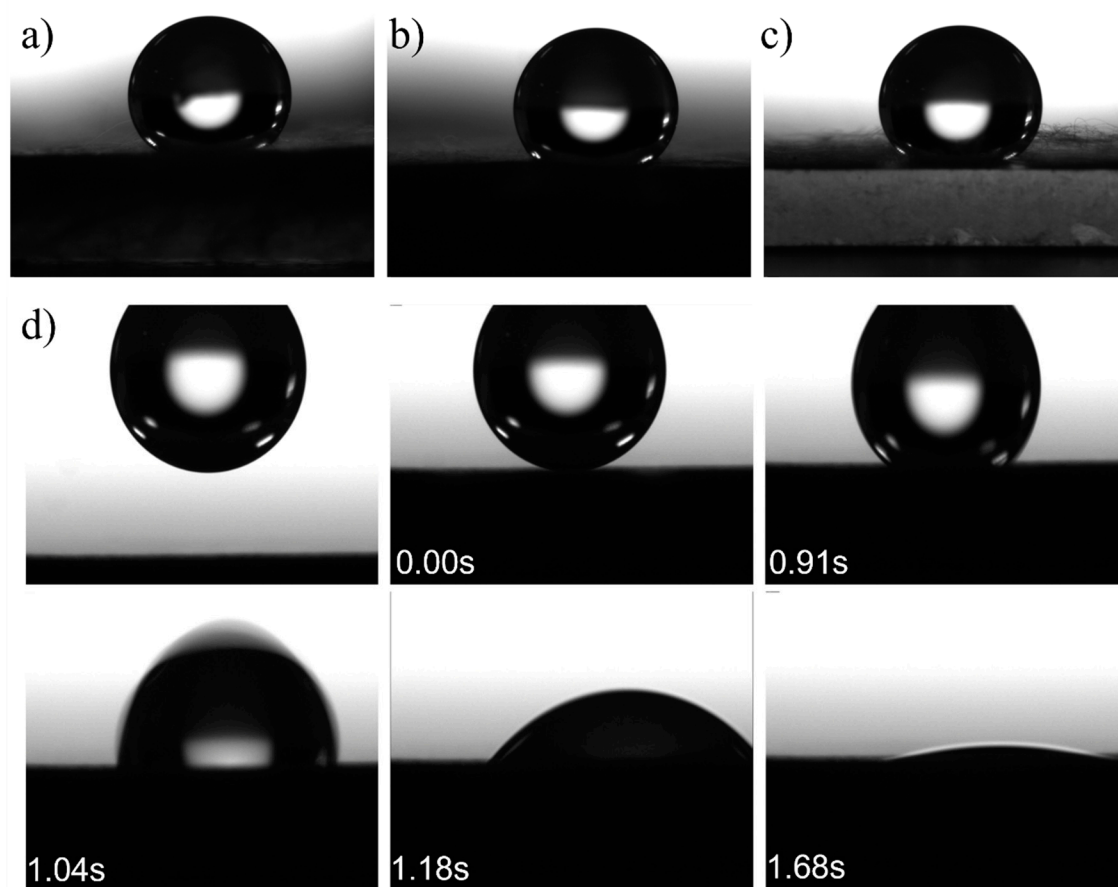

**Figure S3:** water contact angles images for the electrospun systems: (a) PMMA, (b) PMMA SDS, (c) PMMA SDS/HPβCD; (d) PLGA with the capture of video frames.

S4: calibration curve

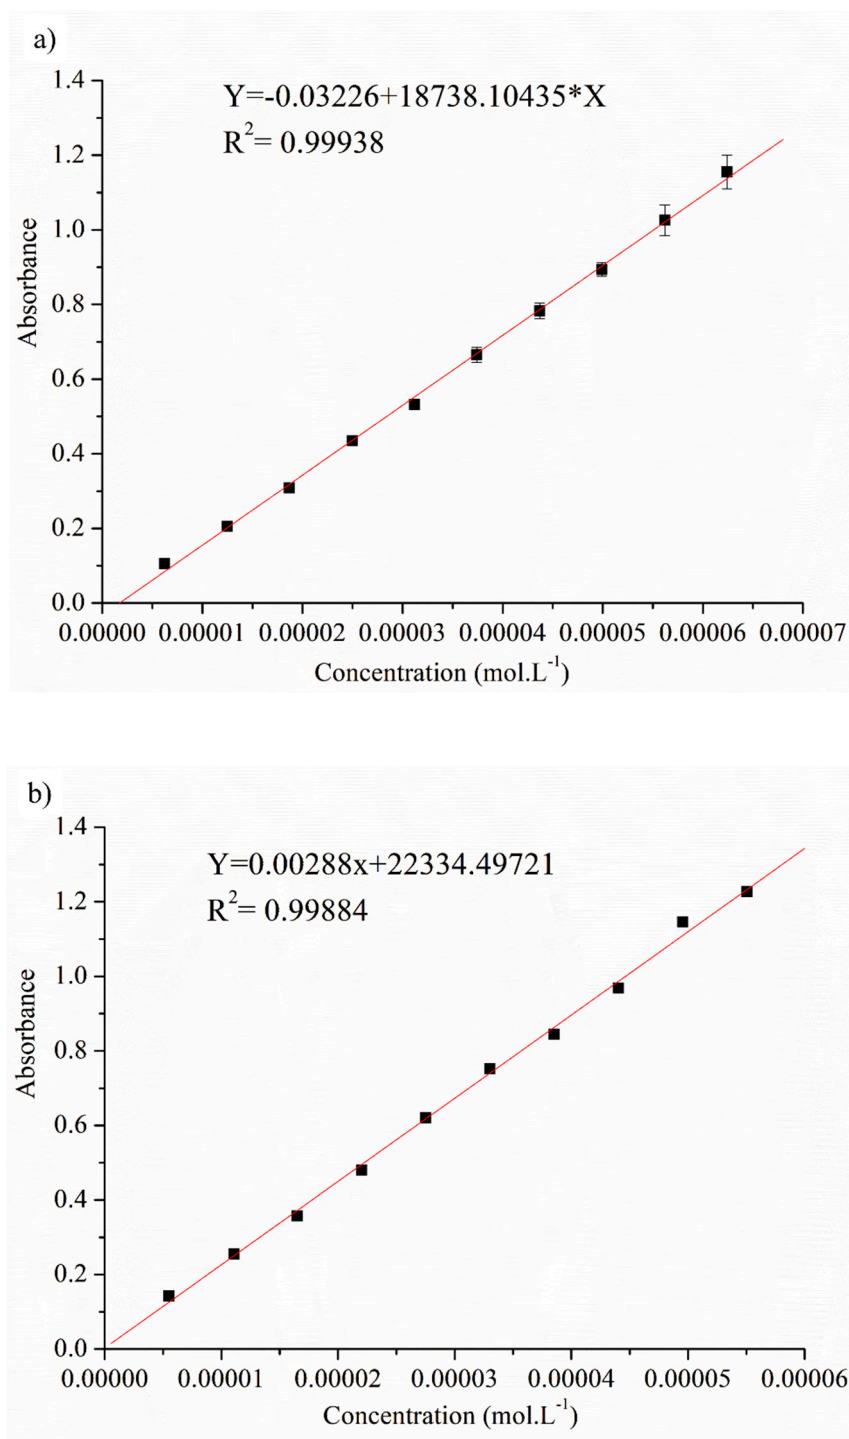

**Figure S4:** Calibration curve for SDS drug: (a) without HPβCD and (b) with HPβCD.

## S5: microscopies images

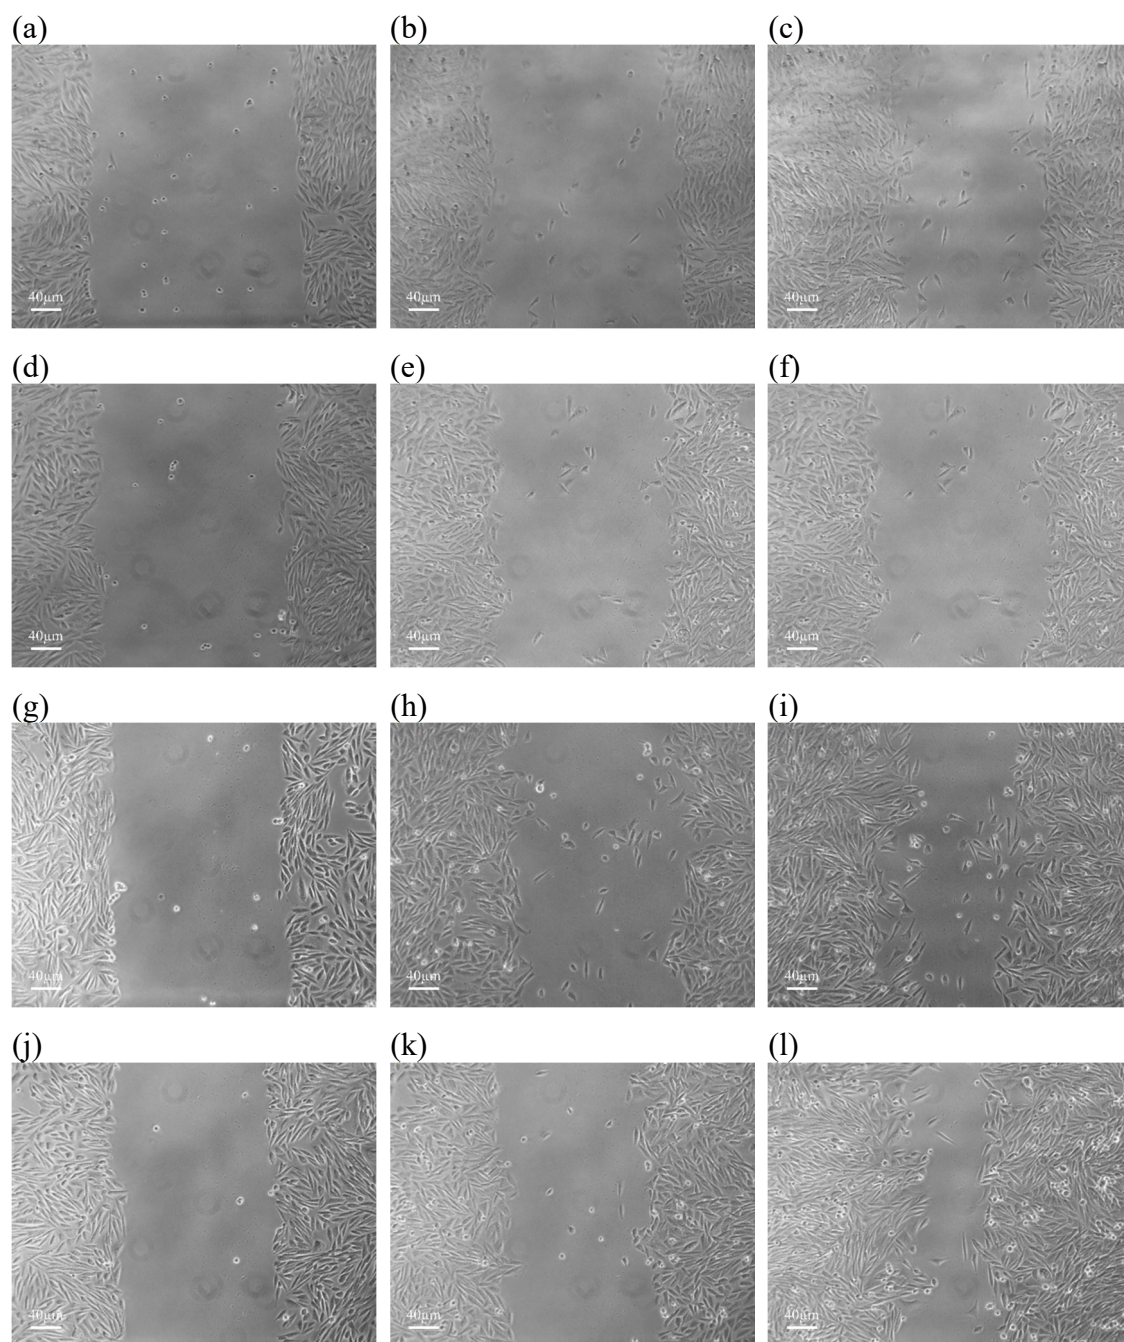

**Figure S5:** Microscopies images of a pseudo-wound created in a fibroblast cell L929 monolayer, at 0 hour (left column), at 10 hours (middle column), and at 24 hours (right column). The pseudo-wounds were treated with (a–c) PMMA, (d–f) PMMA SDS, (g–i) PMMA SDS/HPβCD, and (j–l) control group.



S6: microscopies images

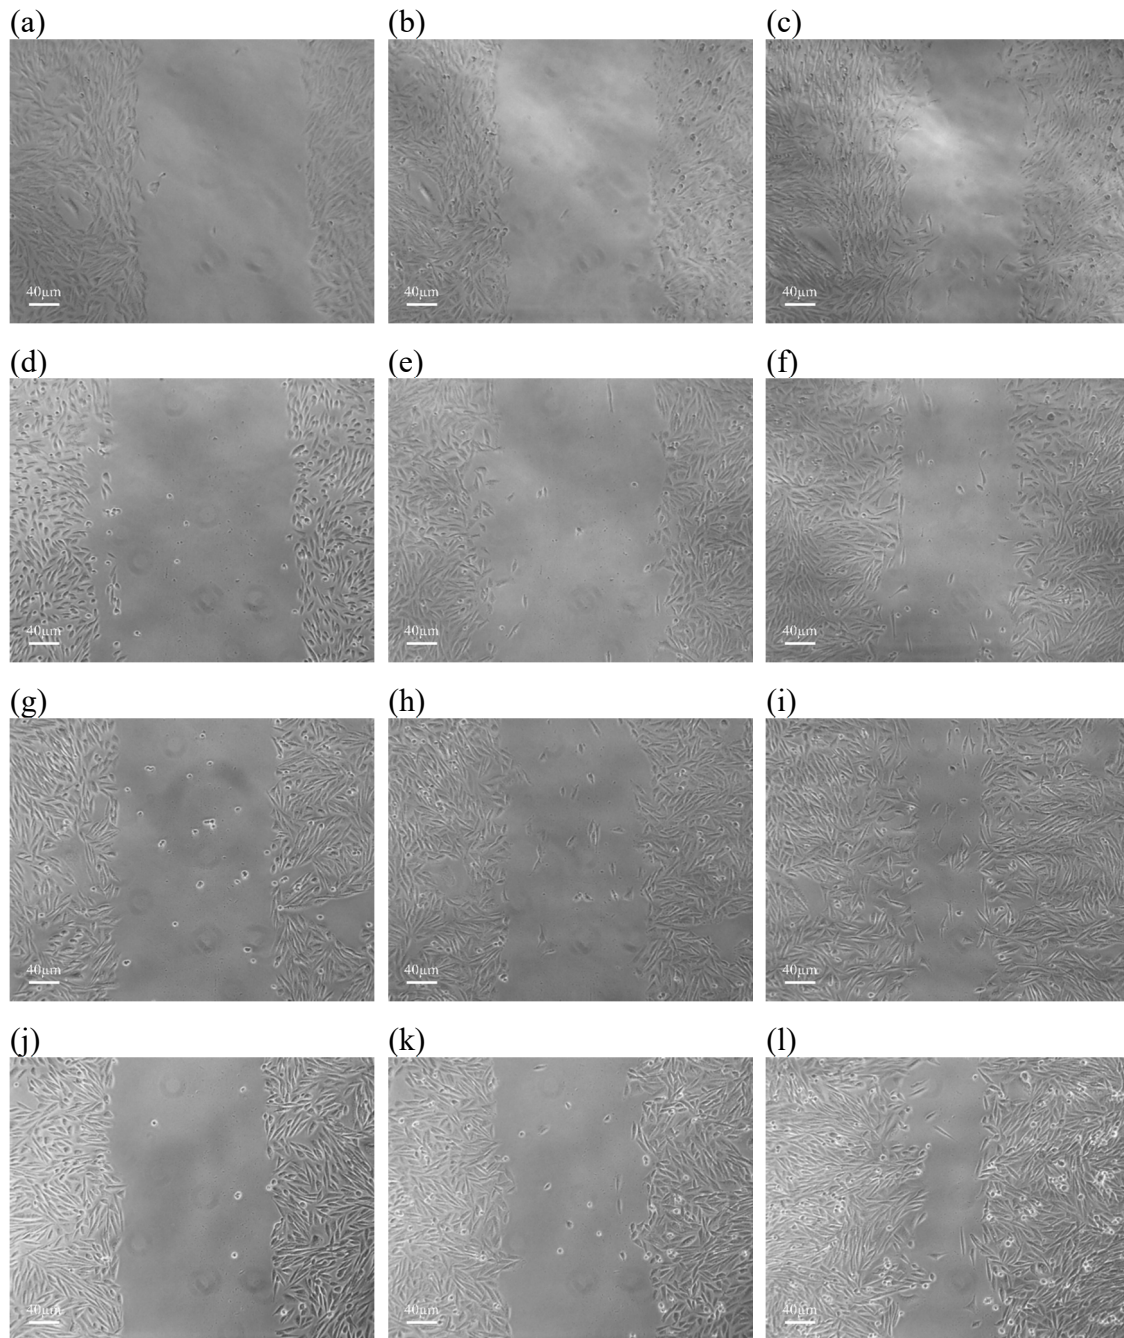

**Figure S6:** Microscopies images of a pseudo-wound created in a fibroblast cell L929 monolayer, at 0 hour (left column), at 10 hours (middle column), and at 24 hours (right column). The pseudo-wounds were treated with (a–c) PLGA, (d–f) PLGA SDS, (g–i) PLGA SDS/HPβCD, and (j–l) control group.
